# Supplementary material for: Template-free synthesis of vanadium sesquioxide (V2O3) nanosheets and their room-temperature sensing performance
Source: Royal Society of Chemistry journal article supplement (doi:10.1039/c7ta10159g), 2018-01-01
Supplement: c7ta10159g1.pdf [file c7ta10159g1.pdf]

### Supplementary data

#### 1. XPS

XPS studies of the film deposited at 100 W was carried out at an interval of 30 days. There was no significant change in the binding energy of O1s peak as shown below:

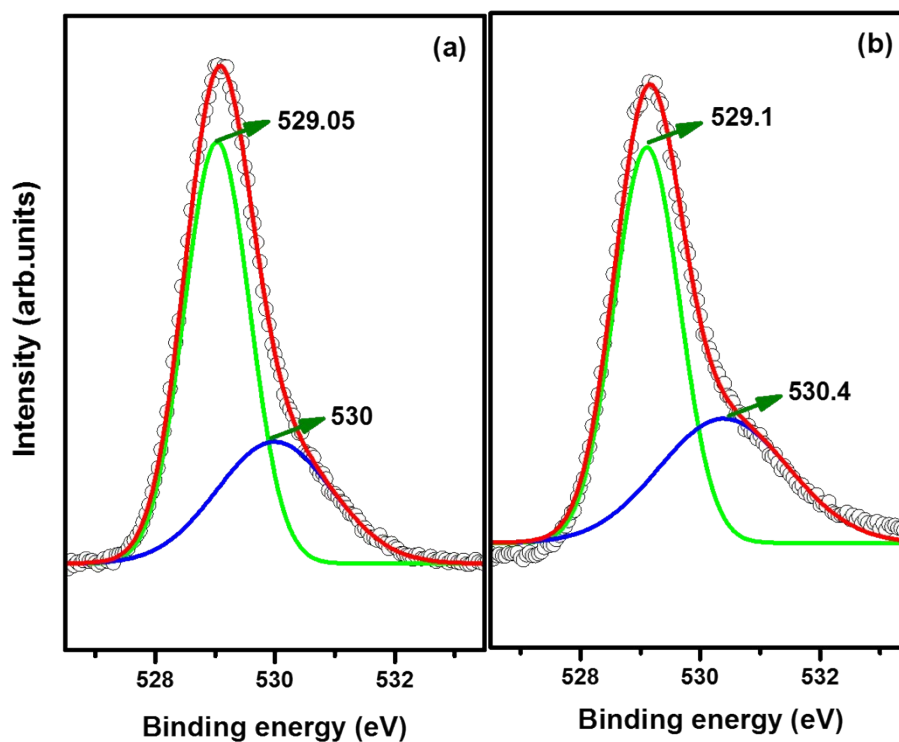

Fig: 1 O1s narrow scan spectra of 100 W deposited thin film taken  
a) immediately after deposition and b) 30 days after deposition.
