# Supplementary material for: Template-free synthesis of vanadium sesquioxide (V2O3) nanosheets and their room-temperature sensing performance
Source: Royal Society of Chemistry journal article supplement (doi:10.1039/c7ta10159g), 2018-01-01
Supplement: c7ta10159g2.pdf [file c7ta10159g2.pdf]

### **Supplementary data**

#### **Selectivity<sup>†</sup>**

Selectivity studies have been done towards various vapours and NO<sub>2</sub> gas. Since, there was already an report of NO<sub>2</sub> sensing studies of ZnO-V<sub>2</sub>O<sub>3</sub><sup>1</sup>, we have checked our nanosheet's sensing performance towards NO<sub>2</sub> gas. Vapour sensing studies have been performed in the home-made vapour sensing setup as mentioned in our manuscript. NO<sub>2</sub> gas sensing studies have been done in an customized gas-sensing chamber as reported elsewhere<sup>2,3</sup>.

#### **References:**

- 1 Yuan-Chang Liang and Yu-Ru Cheng, *CrystEngComm*, 2015, **17**, 5801–5807.
- 2 A. K. Prasad, S. Amirthapandian, S. Dhara, S. Dash, N. Murali and A. K. Tyagi, *Sensors Actuators, B Chem.*, 2014, **191**, 252–256.
- 3 P. Dhivya, A. K. Prasad and M. Sridharan, *Int. J. Hydrogen Energy*, 2012, **37**, 18575–18578.
